# Supplementary material
Source: publisher site journal article supplement (https://www.dovepress.com/article/588299)
Supplement: Supplementary file 1 [file 588299%20Supplementary%20Table%20S1.docx]

|  | Urea-splitting groups | Non-urea-splitting groups | Urine culture-negative groups | Healthy examination participants | P-value* |
| --- | --- | --- | --- | --- | --- |
| Patients | 255(31.5%) | 264(32.6%) | 290(35.9%) | 100 |  |
| Age | 47(37, 57) a | 53(39, 61) | 49(35, 58) | 45(35, 49) | 0.010 |
| Gender |  |  |  |  | <0.001 |
| Male(n) | 130(51.0%) a, b | 87(33.0%) c | 218(75.2%) | 53(53.0%) |  |
| Female(n) | 125(49.0%) | 177(67.0%) | 72(24.8%) | 47(47.0%) |  |
| Body Mass Index | 24.87(22.1, 27.4) | 24.49(22.3, 27.0) | 24.46(22.5, 27.3) | 23.9(20.9, 27.2) | 0.569 |
| Underlying Diseases |  |  |  |  |  |
| Hypertensive | 56(22.0%) | 56(21.2%) | 85(29.3%) | 23(23%) | 0.048 |
| Diabetes | 29(11.4%) | 27(10.2%) | 32(11.0%) | 10(10%) | 0.911 |
| Urine Analysis |  |  |  |  |  |
| Nitrite |  |  |  |  | <0.001 |
| Positive | 54(21.2%) a, b | 82(31.1%) c | 5(1.7%) | 3(3%) |  |
| Negative | 201(78.8%) | 182(68.9%) | 285(98.3%) | 97(97%) |  |
| Leukocyte |  |  |  |  | <0.001 |
| Negative | 47(18.4%) a, b | 22(8.3%) c | 119(41.0%) | 87(87%) |  |
| ± | 24(9.4%) | 16(6.1%) | 53(18.3%) | 10(10%) |  |
| 1+ | 25(9.8%) | 24(9.1%) | 37(12.8%) | 2(2%) |  |
| 2+ | 29(11.4%) | 34(12.9%) | 40(13.8%) | 1(1%) |  |
| 3+ | 130(51.0%) | 168(63.6%) | 41(14.1%) | 0(0%) |  |
| Protein |  |  |  |  | <0.001 |
| Negative | 110(43.1%) a, b | 106(40.2%) c | 174(60.0%) | 93(93%) |  |
| ± | 42(16.5%) | 51(19.3%) | 50(17.2%) | 5(5%) |  |
| 1+ | 86(33.7%) | 93(35.2%) | 59(20.4%) | 1(1%) |  |
| 2+ | 11(4.3%) | 11(4.2%) | 7(2.4%) | 1(1%) |  |
| 3+ | 6(2.4%) | 3(1.1%) | 0(0%) | 0(0%) |  |
| Urine pH | 6.5±0.7 b | 6.4±0.6 | 6.3±0.6 | 5.7±0.6 | 0.007 |
| **P values were calculated for comparisons among the urea-splitting, non–urea-splitting, and urine culture-negative groups only. Health examination participants were included as a reference group and were not included in the primary between-group statistical comparisons.*  a: *P < 0.0167* for *Urea-splitting groups* vs *Non-urea-splitting groups*; b: *P < 0.0167* for *Urea-splitting groups* vs *Urine culture-negative groups*; c: *P < 0.0167* for *Non-urea-splitting groups* vs *Urine culture-negative groups*. | | | | | |

Supplementary Table S1. Comparison of clinical features among the *urea-splitting*, *non–urea-splitting*, and *urine culture-negative groups* with infection stones, with healthy examination participants shown as a reference group.
